# Supplementary material for: Per- and polyfluoroalkyl substances (PFAS) in grocery store foods: method optimization, occurrence, and exposure assessment
Source: Royal Society of Chemistry journal article supplement (doi:10.1039/d3em00268c), 2023-01-01
Supplement: d3em00268c1.xlsx [file d3em00268c1.xlsx]

## Sheet: Table S5
	Table S5. Results (ng/L) of extraction and analytical (i.e., solvent) blanks included in this study. The top three rows of each column denote the blank type, solvent type, and date of analysis, respectively.
	Comment		ACN (with QuEChERs), with 0.2 um filter,Fisher LC-MS CAN	ACN (with QuEChERs), without 0.2 um filter,Fisher LC-MS ACN															Fisher LC-MS ACN	Fisher LC-MS ACN		Fisher LC-MS ACN			Fisher LC-MS ACN				Honeywell LC-MS ACN	Honeywell LC-MS ACN								Honeywell LC-MS ACN
		Solvent	Extraction	Extraction	Extraction	Solvent	Extraction	Solvent	Extraction	Extraction	Extraction	Extraction	Solvent	Extraction	Extraction	Solvent	Extraction	Solvent	Extraction	Solvent	Solvent	Extraction	Extraction	Solvent	Extraction	Extraction	Extraction	Extraction	Extraction	Extraction	Extraction	Solvent	Extraction	Solvent	Extraction	Extraction	Solvent	Extraction	Solvent
		MeOH	ACN	ACN	DCM	MeOH	MTBE	MTBE	MTBE	MTBE	MTBE	MeOH	MeOH	MTBE	MeOH	MeOH	MTBE	MeOH	ACN	ACN	MeOH	ACN	MeOH	MeOH	ACN	MTBE	MTBE	MeOH	ACN	ACN	MeOH	MeOH	MeOH	MeOH	MTBE	MeOH	MeOH	ACN	MeOH
	Compounds	2019-11-09	2019-11-09	2019-11-09	2019-11-09	2019-12-08	2019-12-08	2019-12-08	2020-02-21	2020-03-09	2020-03-09	2020-03-10	2020-03-10	2020-03-10	2020-05-14	2020-05-14	2020-05-14	2020-05-21	2020-05-21	2020-05-21	2020-06-04	2020-06-04	2020-06-18	2020-06-18	2020-06-18	2020-06-18	2020-06-18	2020-06-19	2020-06-27	2020-06-27	2020-08-22	2020-08-22	2020-10-20	2020-10-20	2021-03-06	2021-03-06	2021-03-06	2022-07-26	2022-07-26
	PFBA	<5	<5	<5	<5	<2	<2	<2	<5	<5	<5	<5	<5	<5	<5	<5	<5	<2	6.089	6.324	<20	<20	<5	<5	<5	<5	<5	<5	<10	<10	<2	<2	<20	<20	<10	<10	<10	<2	<2
	PFPeA	<50	<50	<50	<50	<2	<2	<2	<20	<5	<5	<5	<5	<5	<5	<5	<5	<5	<5	<5	<10	<10	<1	<1	<1	<1	<1	<1	<10	<10	<5	<5	<5	<5	<10	<10	<10	<5	<5
	PFHxA	<5	<5	<5	<5	<10	<10	<10	<5	<10	<10	<10	<10	<10	<5	<5	<5	<2	3.988	4.208	<2	<2	<2	<2	<2	<2	<2	<2	<10	<10	<5	<5	<5	<5	<2	<2	<2	<5	<5
	PFHpA	<5	<5	<5	<5	<5	<5	<5	<2	<2	<2	<2	<2	<2	<5	<5	<5	<5	<5	<5	<10	<10	<1	<1	2.137	<1	<1	<1	<10	<10	<2	<2	<10	<10	<5	<5	<5	<2	<2
	PFOA	<5	<5	57.127	<5	<10	<10	<10	<5	<5	<5	<5	<5	<5	<5	<5	<5	<2	52.498	359.931	<2	51.06	<1	<1	68.127	<1	<1	<1	<5	<5	<5	<5	<1	<1	<2	<2	<2	<20	<20
	PFNA	<5	<5	<5	<5	<20	<20	<20	<5	<5	<5	<5	<5	<5	<5	<5	<5	<10	<10	<10	<10	<10	<2	<2	<2	<2	<2	<2	<5	<5	<5	<5	<2	<2	<5	<5	<5	<2	<2
	PFDA	<5	<5	<5	<5	<5	<5	<5	<5	<2	<2	<2	<2	<2	<5	<5	<5	<5	<5	<5	<10	<10	<2	<2	<2	<2	<2	<2	<5	<5	<5	<5	<2	<2	<5	<5	<5	<2	<2
	PFUdA	<5	<5	<5	12.893	<5	<5	<5	<5	<5	<5	<5	<5	<5	<5	<5	<5	<10	<10	<10	<10	<10	<5	<5	<5	<5	<5	<5	<5	<5	<5	<5	<5	<5	<1	<1	<1	<5	<5
	PFDoA	<5	<5	<5	<5	<20	<20	<20	<5	<5	<5	<5	<5	<5	<10	<10	<10	<5	<5	<5	<10	<10	<2	<2	<2	<2	<2	<2	<5	<5	<1	<1	<10	<10	<2	<2	<2	<2	<2
	PFTrDA	<5	<5	<5	<5	<10	<10	<10	<10	<20	<20	<20	<20	<20	<50	<50	<50	<20	<20	<20	<20	<20	<5	<5	<5	<5	<5	<5	<5	<5	<5	<5	<5	<5	<2	<2	<2	<5	<5
	PFTeDA	<20	<20	<20	<20	<20	<20	<20	<20	<5	<5	<5	<5	<5	<50	<50	<50	<20	<20	<20	<20	<20	<5	<5	<5	<5	<5	<5	<5	<5	<5	<5	<5	<5	<20	<20	<20	<5	<5
	PFBS	<5	<5	<5	31.9	<5	<5	<5	<5	<5	<5	<5	<5	<5	<5	<5	<5	<5	<5	<5	<10	<10	<1	<1	<1	<1	<1	<1	<5	<5	<5	<5	<10	<10	<10	<10	<10	<10	<10
	PFPeS	<5	<5	<5	<5	<2	<2	<2	<10	<10	<10	<10	<10	<10	<5	<5	<5	<5	<5	<5	<10	<10	<2	<2	<2	<2	<2	<2	<5	<5	<2	<2	<10	<10	<2	<2	<2	<5	<5
	PFHxS	<10	<10	<10	<10	<5	<5	<5	<5	<5	<5	<5	<5	<5	<5	<5	<5	<20	<20	<20	<10	<10	<10	<10	<10	<10	<10	<10	<10	<10	<5	<5	<10	<10	<5	<5	<5	<20	<20
	PFHpS	<5	<5	<5	50.607	<10	<10	<10	<5	<5	<5	<5	<5	<5	<5	<5	<5	<10	<10	<10	<10	<10	<5	<5	<5	<5	<5	<5	<10	<10	<5	<5	<10	<10	<10	<10	<10	<20	<20
	PFOS	<5	<5	<5	<5	<50	<50	<50	<20	<50	<50	<50	<50	<50	<10	<10	<10	<10	<10	<10	<20	<20	<5	<5	<5	<5	<5	<5	<10	<10	<2	<2	<10	<10	<10	<10	<10	<20	<20
	PFNS	<10	<10	<10	<10	<5	<5	<5	<10	<20	<20	<20	<20	<20	<5	<5	<5	<10	<10	<10	<10	<10	<5	<5	<5	<5	<5	<5	<10	<10	<2	<2	<5	<5	<5	<5	<5	<20	<20
	PFDS	<10	<10	<10	101.895	<20	<20	<20	<10	<5	<5	<5	<5	<5	<10	<10	<10	<10	<10	<10	<10	<10	<2	<2	<2	<2	<2	<2	<5	<5	<5	<5	<20	<20	<5	<5	<5	<5	<5
	FOSA	<10	<10	<10	<10	<5	<5	<5	<20	<20	<20	<20	<20	<20	<10	<10	<10	<10	<10	<10	<10	<10	<2	<2	<2	<2	<2	<2	<5	<5	<2	<2	<5	<5	<5	<5	<5	<5	<5
	N-EtFOSAA	<50	<50	<50	<50	<5	<5	<5	<10	<5	<5	<5	<5	<5	<50	<50	<50	<10	<10	<10	<20	<20	<10	<10	<10	<10	<10	<10	<5	<5	<5	<5	<10	<10	<5	<5	<5	<5	<5
	N-MeFOSAA	<20	<20	<20	<20	<5	<5	<5	<10	<10	<10	<10	<10	<10	<10	<10	<10	<50	<50	<50	<10	<10	<5	<5	<5	<5	<5	<5	<5	<5	<5	<5	<10	<10	<5	<5	<5	<5	<5
	4:2 FTS	<5	<5	<5	<5	<5	<5	<5	<10	<2	<2	<2	<2	<2	<5	<5	<5	<5	<5	<5	<10	<10	<5	<5	<5	<5	<5	<5	<10	<10	<5	<5	<5	<5	<10	<10	<10	<5	<5
	6:2 FTS	<10	<10	<10	125.598	<20	<20	<20	<10	<5	<5	<5	<5	<5	<5	<5	<5	<5	<5	5.48	<2	28.429	<100	<100	191.581	<100	<100	<100	<100	<100	<10	<10	<10	<10	<10	<10	<10	<5	<5
	8:2 FTS	<5	<5	<5	53.117	<10	<10	<10	<10	<20	<20	<20	<20	<20	<10	<10	<10	<5	<5	<5	<20	<20	<10	<10	<10	<10	<10	<10	<10	<10	<2	<2	<10	<10	<10	<10	<10	<10	<10

## Sheet: Table S6
	Table S6. IS and MS recoveries (%) for matrices extractions using the ACN extraction method.
	PFAS Tested		This Study (with QuECHERs)						This Study (with QuECHERs)				This Study (without QuECHERs)				Literature
			Dried Organic Radish Root		Dried Organic Radish Shoot		Dried Organic Lettuce		Milk:Acetonitrile (1:9; v:v)		Milk:Acetonitrile (1:1; v:v)		Dried Earthworm		Wet Earthworm
			Avg Recoveries (%)	STD	Avg Recoveries (%)	STD	Avg Recoveries (%)	STD	Avg Recoveries (%)	STD	Avg Recoveries (%)	STD	Avg Recoveries (%)	STD	Avg Recoveries (%)	STD	All Matrices (with QuECHERs)	Citations (Matrix)	All Matrices (without QuECHERs)	Citations (Matrix Extracted)
	PFBA	Matrix Spike	N/A	N/A	N/A	N/A	N/A	N/A	64.1268	0.366436	88.0378	2.00416	104.79	1.33082	89.0574	8.11125	87-105	Lacina, 2011 (milk); Genualdi, 2021 (lettuce, milk, bread and salmon)	N/A	N/A
		13C4-PFBA	0.894143	1.07071	2.73413	1.74066	2.17666	0.994587	81.7117	11.7107	39.8243	1.07755	67	4.02009	66.8572	3.69299	N/A		N/A	N/A
	PFPeA	Matrix Spike	N/A	N/A	N/A	N/A	N/A	N/A	58.8382	1.46325	83.8136	6.46291	91.9	1.12459	120.172	18.0352	94-115	Lacina, 2011 (milk); Genualdi, 2021 (lettuce, milk, bread and salmon)	N/A	N/A
		13C5-PFPeA	2.80161	2.01158	2.33365	0.63245	2.27611	0.912519	94.8605	10.7663	14.447	0.969973	63.41	2.59745	19.1706	1.61225	N/A		N/A	N/A
	PFHxA	Matrix Spike	N/A	N/A	N/A	N/A	N/A	N/A	65.0369	1.69349	87.1667	0.990478	107.81	0.724292	161.164	7.76303	97-112	Krippner, 2015 (Maize); Lacina, 2011 (milk);Genualdi, 2021 (lettuce, milk, bread and salmon)	N/A	N/A
		13C5-PFHxA	4.69314	2.46091	3.37438	0.535199	2.26498	1.42173	94.232	13.4521	14.5233	1.25532	64.92	1.071	9.57099	0.254302	N/A		N/A	N/A
	PFHpA	Matrix Spike	N/A	N/A	N/A	N/A	N/A	N/A	59.7319	3.76669	95.0046	4.37988	78.16	1.56858	91.3283	2.78768	60-115	Lasee, 2019 (Carrot, radish, alfalfa); Lacina, 2011 (milk);Genualdi, 2021 (lettuce, milk, bread and salmon)	68.9-104.9	Malinsky, 2011 (fish fillet)
		13C4-PFHpA	11.297	6.0743	5.67628	0.451617	4.19006	1.83084	86.3387	12.1937	54.7577	7.02126	65.15	3.84567	3.03488	0.210797	N/A		N/A
	PFOA	Matrix Spike	N/A	N/A	N/A	N/A	N/A	N/A	85.1451	2.04736	125.068	2.59863	101.25	0	110.787	4.50048	60-115	Lasee, 2019 (Carrot, radish, alfalfa); Lacina, 2011 (milk);Genualdi, 2021 (lettuce, milk, bread and salmon)	67-113	Malinsky, 2011 (fish fillet); Rich, 2015 (earthworm)
		13C8-PFOA	14.4581	6.39565	7.09183	1.01011	5.31561	3.0939	94.6305	12.5924	85.8021	9.82525	67.93	3.98246	28.1106	3.19427	N/A		95.5-114.5	Malinsky, 2011 (fish fillet)
	PFNA	Matrix Spike	N/A	N/A	N/A	N/A	N/A	N/A	60.6159	2.77061	80.1143	4.1156	109.59	2.32278	103.458	4.41009	60-115	Lasee, 2019 (Carrot, radish, alfalfa); Lacina, 2011 (milk);Genualdi, 2021 (lettuce, milk, bread and salmon)	68.4-105.4	Malinsky, 2011 (fish fillet); Rich, 2015 (earthworm)
		13C9-PFNA	16.8417	7.92635	7.21157	1.10422	5.40175	2.2973	107.154	14.3738	77.1792	13.3368	73.77	9.83002	117.635	1.91875	N/A		N/A
	PFDA	Matrix Spike	N/A	N/A	N/A	N/A	N/A	N/A	56.8254	2.18457	75.8356	0.676584	110.57	1.36228	95.604	4.32026	98-111	Lacina, 2011 (milk); Genualdi, 2021 (lettuce, milk, bread and salmon)	75.5-110.2	Malinsky, 2011 (fish fillet); Rich, 2015 (earthworm)
		13C6-PFDA	18.5257	4.59308	7.35385	1.09618	6.68615	2.0972	113.278	14.966	88.1355	8.75444	74.53	13.2884	119.503	2.26359	N/A		N/A
	PFUdA	Matrix Spike	N/A	N/A	N/A	N/A	N/A	N/A	61.6695	4.09713	87.7105	3.46126	87.8	5.06284	101.368	3.33613	97-105	Lacina, 2011 (milk);	64.7-115	Malinsky, 2011 (fish fillet); Rich, 2015 (earthworm)
		13C7-PFUnA	24.2182	4.8565	8.98344	0.857359	6.10772	1.65784	107.211	15.4889	86.7184	2.06735	89.25	14.9272	120.496	4.27939	N/A		N/A
	PFDoA	Matrix Spike	N/A	N/A	N/A	N/A	N/A	N/A	62.0489	1.92338	81.0657	2.85198	87.58	4.12075	101.362	3.67187	95-105	Lacina, 2011 (milk);	78.7-107.8	Malinsky, 2011 (fish fillet); Rich, 2015 (earthworm)
		13C2-PFDoA	8.17042	1.40043	2.57602	0.679843	1.60934	0.217899	39.7328	8.06456	53.2966	10.321	76.73	8.51543	71.3373	4.63164	N/A		N/A
	PFTrDA	Matrix Spike	N/A	N/A	N/A	N/A	N/A	N/A	33.2933	3.36511	40.6687	4.64815	55.82	11.5376	67.4068	3.56182	94-100	Lacina, 2011 (milk);	N/A	N/A
		13C2-PFTeDA	N/A	N/A	N/A	N/A	N/A	N/A	N/A	N/A	N/A	N/A	N/A	N/A	N/A	N/A	N/A		N/A	N/A
	PFTeDA	Matrix Spike	N/A	N/A	N/A	N/A	N/A	N/A	67.6765	0.590645	70.0948	3.64764	95.82	7.32833	94.1066	1.15431	87-97	Lacina, 2011 (milk);	N/A	N/A
		13C2-PFTeDA	18.5083	5.58612	3.74668	0.826315	0.459296	0.649542	219.045	40.4412	108.489	32.866	67.65	13.5984	103.991	6.23599	N/A		N/A	N/A
	PFBS	Matrix Spike	N/A	N/A	N/A	N/A	N/A	N/A	55.826	4.98936	89.3355	3.88665	95.94	1.7122	112.195	8.80396	60-115	Krippner, 2015 (Maize);Lasee, 2019 (Carrot, radish, alfalfa);Lacina, 2011 (milk);Genualdi, 2021 (lettuce, milk, bread and salmon)	88.4-120.4	Malinsky, 2011 (fish fillet)
		13C3-PFBS	53.6833	7.81496	48.4797	9.76263	51.1106	7.1082	103.144	13.8223	49.2186	4.56433	67.3	6.1789	33.4363	4.27434	N/A		N/A
	PFPeS	Matrix Spike	N/A	N/A	N/A	N/A	N/A	N/A	59.6906	4.25447	51.1364	3.92999	77.78	0.288512	79.4579	6.71359	96-111	Genualdi, 2021 (lettuce, milk, bread and salmon)	N/A	N/A
		13C3-PFBS	N/A	N/A	N/A	N/A	N/A	N/A	N/A	N/A	N/A	N/A	N/A	N/A	N/A	N/A	N/A	N/A	N/A	N/A
	PFHxS	Matrix Spike	N/A	N/A	N/A	N/A	N/A	N/A	72.3103	5.20287	77.6912	1.8533	89.8	2.2071	94.8189	4.25183	60-115	Lasee, 2019 (Carrot, radish, alfalfa); Lacina, 2011 (milk);Genualdi, 2021 (lettuce, milk, bread and salmon)	68.9-109	Malinsky, 2011 (fish fillet); Rich, 2015 (earthworm)
		13C3-PFHxS	82.0443	6.11435	72.5088	3.33425	71.4704	11.4726	97.8371	16.4358	77.9192	10.895	62.11	14.3069	21.6475	1.25932	N/A		N/A
	PFHpS	Matrix Spike	N/A	N/A	N/A	N/A	N/A	N/A	71.5558	1.19777	102.942	10.1443	92.64	1.92734	77.1831	4.80123	N/A	N/A	N/A	N/A
		13C3-PFHxS	N/A	N/A	N/A	N/A	N/A	N/A	N/A	N/A	N/A	N/A	N/A	N/A	N/A	N/A	N/A	N/A	N/A	N/A
	PFOS	Matrix Spike	N/A	N/A	N/A	N/A	N/A	N/A	59.3685	2.07607	75.1569	4.95417	96.82	7.56463	100.063	2.8937	60-115	Lasee, 2019 (Carrot, radish, alfalfa); Lacina, 2011 (milk);Genualdi, 2021 (lettuce, milk, bread and salmon)	69.6-110.4	Malinsky, 2011 (fish fillet); Rich, 2015 (earthworm)
		13C8-PFOS	80.7238	6.01594	71.3417	3.28058	70.32	11.2879	97.4922	16.3778	78.666	10.9995	84.41	13.813	99.797	4.24117	N/A		96.9-113.1	Malinsky, 2011 (fish fillet)
	PFNS	Matrix Spike	N/A	N/A	N/A	N/A	N/A	N/A	68.9745	3.52262	87.4777	7.20789	76.44	1.46851	105.663	4.91073	N/A	N/A	N/A	N/A
		13C8-PFOS	N/A	N/A	N/A	N/A	N/A	N/A	N/A	N/A	N/A	N/A	N/A	N/A	N/A	N/A	N/A	N/A	N/A	N/A
	PFDS	Matrix Spike	N/A	N/A	N/A	N/A	N/A	N/A	52.4878	1.52682	93.1452	3.33222	87.18	3.87487	101.262	3.61759	94-100	Lacina, 2011 (milk)	56-63	Rich, 2015 (earthworm)
		13C8-PFOS	N/A	N/A	N/A	N/A	N/A	N/A	N/A	N/A	N/A	N/A	N/A	N/A	N/A	N/A	N/A		N/A
	FOSA	Matrix Spike	N/A	N/A	N/A	N/A	N/A	N/A	65.4623	6.77548	81.8529	2.35632	91.04	2.85846	109.188	6.33478	94-102	Lacina, 2011 (milk)	92-114	Malinsky, 2011 (fish fillet)
		13C8-FOSA	0	0	0	0	0	0	108.819	6.31741	25.1582	5.6777	70.34	11.1622	60.6741	1.10021	N/A		N/A
	EtFOSAA	Matrix Spike	N/A	N/A	N/A	N/A	N/A	N/A	70.4584	2.04453	74.3498	2.83476	104	2.93155	97.408	6.14222	91-109	Lacina, 2011 (milk)	N/A	N/A
		d3-EtFOSAA	14.8584	6.27282	30.3069	0.425314	27.3535	7.94893	164.38	20.6688	70.7278	28.0657	68.99	8.5658	141.64	2.48278	30-69	Lasee, 2019 (Carrot, radish, alfalfa)	N/A	N/A
	MeFOSAA	Matrix Spike	N/A	N/A	N/A	N/A	N/A	N/A	60.6893	7.31193	74.2405	4.43116	97.91	2.1612	98.0958	1.96732	91-101	Lacina, 2011 (milk);	N/A	N/A
		d5-MeFOSAA	19.663	9.48907	32.0747	2.40319	35.3357	6.95983	134.748	13.9007	65.7528	19.4364	60.29	10.4759	220.07	11.1099	N/A		N/A	N/A
	4:2 FtS	Matrix Spike	N/A	N/A	N/A	N/A	N/A	N/A	59.9913	3.70486	84.8806	2.51206	39.26	3.71576	98.6485	10.0275	N/A	N/A	N/A	N/A
		13C2-4:2 FtS	26.2899	29.9306	47.7583	33.3049	23.9963	27.3452	76.8409	7.96942	76.6192	8.95004	15.34	0.810153	13.0241	1.01913	N/A	N/A	N/A	N/A
	6:2 FtS	Matrix Spike	N/A	N/A	N/A	N/A	N/A	N/A	68.1668	3.18529	49.2644	4.8259	118.15	1.96351	96.8871	11.2644	N/A	N/A	N/A	N/A
		13C2-6:2 FtS	0	0	0	0	1.04023	1.4711	143.996	13.6538	265.436	28.6237	50.11	5.69183	82.8358	6.30665	N/A	N/A	N/A	N/A
	8:2 FtS	Matrix Spike	N/A	N/A	N/A	N/A	N/A	N/A	61.2214	8.97931	73.1532	5.40006	93.75	1.82107	97.4362	4.53923	N/A	N/A	N/A	N/A
		13C2-8:2 FtS	0.718604	1.01626	0	0	1.00364	1.41937	205.95	45.4919	176.178	4.99618	69.37	30.6895	224.613	7.8589	N/A	N/A	N/A	N/A

## Sheet: Table S7
	Table S7. IS and MS recoveries (%) for plant extractions using the DCM extraction method.
	PFAS Tested		This Study						Literature
			Dried Organic Radish Root		Dried Organic Radish Shoot		Dried Organic Lettuce
			Avg Recoveries (%)	STD	Avg Recoveries (%)	STD	Avg Recoveries (%)	STD	All matrices	Citations (Matrix)
	PFBA	Matrix Spike	165.55	N/A	148.56	N/A	160	N/A	80-121	Blaine, 2013；(Lettuce and tomato)
		13C4-PFBA	36.8571	9.693	16.494	0.98947	17.8476	1.5778	N/A	N/A
	PFPeA	Matrix Spike	85.23	N/A	85.69	N/A	91.67	N/A	82-90	Blaine, 2013；(Lettuce and tomato)
		13C5-PFPeA	61.0383	4.23557	42.6174	2.07333	38.3742	1.79864	N/A	N/A
	PFHxA	Matrix Spike	99.18	N/A	96.71	N/A	108.27	N/A	92-110	Blaine, 2013；(Lettuce and tomato)
		13C5-PFHxA	62.3272	0.361445	58.4154	1.6448	47.2554	2.08824	N/A	N/A
	PFHpA	Matrix Spike	110.34	N/A	133.18	N/A	109.17	N/A	50-80	Blaine, 2013；(Lettuce and tomato)
		13C4-PFHpA	67.8723	4.66843	65.179	1.15031	60.6871	2.34851	N/A	N/A
	PFOA	Matrix Spike	81.67	N/A	79.93	N/A	82.51	N/A	30-98	Blaine, 2013；(Lettuce and tomato)
		13C8-PFOA	59.3737	4.37127	80.3222	8.9848	63.3357	1.57705	103-115	Yoo, 2011;
	PFNA	Matrix Spike	79.85	N/A	98.74	N/A	171.75	N/A	75-90	Blaine, 2013；(Lettuce and tomato)
		13C9-PFNA	86.7361	7.85658	77.6176	2.68872	34.3175	23.8374	N/A	N/A
	PFDA	Matrix Spike	90.91	N/A	102.79	N/A	93.29	N/A	60-90	Blaine, 2013；(Lettuce and tomato)
		13C6-PFDA	104.363	9.15138	76.9035	3.68536	80.1532	8.17774	N/A	N/A
	PFUdA	Matrix Spike	0	N/A	89	N/A	85	N/A	N/A	N/A
		13C7-PFUnA	42.7602	29.6757	49.8575	2.30715	39.5009	2.0871	N/A	N/A
	PFDoA	Matrix Spike	0	N/A	88	N/A	0	N/A	N/A	N/A
		13C2-PFDoA	10.5771	6.96905	6.50412	4.31972	2.23641	3.16276	N/A	N/A
	PFTrDA	Matrix Spike	168	N/A	69	N/A	0	N/A	N/A	N/A
		13C2-PFTeDA	N/A	N/A	N/A	N/A	N/A	N/A	N/A	N/A
	PFTeDA	Matrix Spike	64	N/A	92	N/A	99	N/A	N/A	N/A
		13C2-PFTeDA	4.42521	0.942292	10.0277	1.72235	14.998	6.83079	N/A	N/A
	PFBS	Matrix Spike	64.06	N/A	53.64	N/A	64.28	N/A	50-150	Blaine, 2013；(Lettuce and tomato)
		13C3-PFBS	62.7388	3.87709	57.0809	3.10942	60.9042	3.54328	N/A	N/A
	PFPeS	Matrix Spike	0	N/A	0	N/A	0	N/A	N/A	N/A
		13C3-PFBS	N/A	N/A	N/A	N/A	N/A	N/A	N/A	N/A
	PFHxS	Matrix Spike	0	N/A	0	N/A	1.55	N/A	70-90	Blaine, 2013；(Lettuce and tomato)
		13C3-PFHxS	49.8435	4.17276	52.0991	1.99366	130.732	14.4015	N/A	N/A
	PFHpS	Matrix Spike	65.93	N/A	93.37	N/A	82.59	N/A	20-70	Blaine, 2013；(Lettuce and tomato)
		13C3-PFHxS	N/A	N/A	N/A	N/A	N/A	N/A	N/A	N/A
	PFOS	Matrix Spike	92.27	N/A	100.77	N/A	84.69	N/A	70-90	Blaine, 2013；(Lettuce and tomato)
		13C8-PFOS	49.0413	4.1056	51.2605	1.96157	36.1039	23.5743	N/A	N/A
	PFNS	Matrix Spike	92	N/A	101	N/A	0	N/A	N/A	N/A
		13C8-PFOS	N/A	N/A	N/A	N/A	N/A	N/A	N/A	N/A
	PFDS	Matrix Spike	32.78	N/A	54.03	N/A	63.49	N/A	50-122	Blaine, 2013；(Lettuce and tomato)
		13C8-PFOS	N/A	N/A	N/A	N/A	N/A	N/A	N/A	N/A
	FOSA	Matrix Spike	0	N/A	0	N/A	126	N/A	N/A	N/A
		13C8-FOSA	0	0	4.93109	3.68583	3.723	5.26512	N/A	N/A
	EtFOSAA	Matrix Spike	123	N/A	114	N/A	95	N/A	N/A	N/A
		d3-EtFOSAA	52.5135	34.9653	43.6141	5.43625	41.6254	5.79626	N/A	N/A
	MeFOSAA	Matrix Spike	46	N/A	0	N/A	95	N/A	N/A	N/A
		d5-MeFOSAA	85.5658	9.0119	47.9947	1.03828	63.3994	6.63451	N/A	N/A
	4:2 FtS	Matrix Spike	117	N/A	88	N/A	107	N/A	N/A	N/A
		13C2-4:2 FtS	67.0008	13.5326	69.1013	4.20133	69.4363	3.15118	N/A	N/A
	6:2 FtS	Matrix Spike	0	N/A	18	N/A	19	N/A	N/A	N/A
		13C2-6:2 FtS	38.6231	25.5831	93.3516	10.7659	91.4755	10.031	N/A	N/A
	8:2 FtS	Matrix Spike	46	N/A	0	N/A	65	N/A	N/A	N/A
		13C2-8:2 FtS	75.4948	3.4474	41.8066	29.0002	28.9741	40.9755	N/A	N/A

## Sheet: Table S8a
	Table S8a. IS and MS recoveries (%) for plant extractions using the MTBE method. Unless otherwise noted, all foods were extracted at fresh weight.
	PFAS Tested		This Study																																				Baby Food (all dried before extraction)
			Celery		Corn		Canned Corn		Green Beans		Canned Green Beans		Strawberry		Dried Strawberry		Tomato		Dried Tomato		Carrot Root		Carrot Shoot		Radish Root		Radish Shoot		Organic Lettuce		Lettuce		Dried Organic Lettuce		Dried Organic Radish Root		Dired Organic Radish Shoot		3/5 carrot		1/4 veggie, 2tsp rice and 1(3/4)tsp beef		22 greenbeans		tippy carrots		2/5 sweet potato and 1/5 corn		1/2 apple, 1 strawberry and 1/10 banana
			Avg Recoveries (%)	STD	Avg Recoveries (%)	STD	Avg Recoveries (%)	STD	Avg Recoveries (%)	STD	Avg Recoveries (%)	STD	Avg Recoveries (%)	STD	Avg Recoveries (%)	STD	Avg Recoveries (%)	STD	Avg Recoveries (%)	STD	Avg Recoveries (%)	STD	Avg Recoveries (%)	STD	Avg Recoveries (%)	STD	Avg Recoveries (%)	STD	Avg Recoveries (%)	STD	Avg Recoveries (%)	STD	Avg Recoveries (%)	STD	Avg Recoveries (%)	STD	Avg Recoveries (%)	STD	Avg Recoveries (%)	STD	Avg Recoveries (%)	STD	Avg Recoveries (%)	STD	Avg Recoveries (%)	STD	Avg Recoveries (%)	STD	Avg Recoveries (%)
	PFBA	Matrix Spike	N/A	N/A	30.8523	4.12261	71.4876	2.49218	22.1007	3.53709	96.2818	2.31845	N/A	N/A	N/A	N/A	N/A	N/A	N/A	N/A	N/A	N/A	N/A	N/A	N/A	N/A	N/A	N/A	N/A	N/A	N/A	N/A	94.8216	3.9413	99.606	4.98545	104.673	6.94538	N/A	N/A	N/A	N/A	N/A	N/A	N/A	N/A	109.705	2.45615	98.2235
		13C4-PFBA	41.2916	5.67719	68.5798	7.74736	65.7751	8.6957	54.7931	6.98264	80.0396	11.5004	9.51785	1.58778	33.9118	2.40421	18.8544	4.14605	11.8574	1.05343	71.7604	8.97979	74.128	11.3538	60.9524	1.65068	47.3825	2.13042	78.7774	3.64547	88.0428	5.60668	73.6633	4.553	96.1015	7.38528	72.7712	5.2759	85.8467	1.78542	41.6478	2.33866	64.316	2.5228	79.2183	1.34594	61.6443	0.534388	87.642
	PFPeA	Matrix Spike	N/A	N/A	45.0335	5.34634	83.4012	2.68192	43.0422	3.91884	87.7184	1.88612	N/A	N/A	N/A	N/A	N/A	N/A	N/A	N/A	N/A	N/A	N/A	N/A	N/A	N/A	N/A	N/A	N/A	N/A	N/A	N/A	89.1152	2.61366	85.9679	3.37856	88.7465	6.80027	N/A	N/A	N/A	N/A	N/A	N/A	N/A	N/A	82.1227	2.13938	91.148
		13C5-PFPeA	17.0913	0.869138	95.4229	11.7607	89.3219	9.3524	103.014	12.7222	91.8087	11.0058	1.9059	0.199695	64.3235	6.22735	6.72743	0.443672	42.9191	3.43128	11.1914	1.5997	15.4851	2.23043	10.3187	0.612619	14.3217	2.05468	16.3155	0.576495	17.2585	0.627513	81.0255	7.12992	74.874	20.6672	101.236	6.92437	111.513	4.6145	60.7582	2.91349	88.4048	2.75867	97.7866	3.93317	117.885	3.61099	122.122
	PFHxA	Matrix Spike	N/A	N/A	56.9568	10.1394	82.7404	3.27458	52.3491	5.97724	85.5755	1.36269	N/A	N/A	N/A	N/A	N/A	N/A	N/A	N/A	N/A	N/A	N/A	N/A	N/A	N/A	N/A	N/A	N/A	N/A	N/A	N/A	119.965	4.22503	113.331	2.84717	125.737	9.68576	N/A	N/A	N/A	N/A	N/A	N/A	N/A	N/A	108.161	8.09042	108.995
		13C5-PFHxA	58.9239	3.62922	129.229	12.5663	112.383	15.8155	114.563	15.4658	113.836	17.5583	3.56942	0.249576	68.8424	6.98493	43.7816	4.13193	55.3292	4.35663	62.8693	6.58791	90.9499	10.6149	78.7589	3.46681	74.9251	5.37275	92.5144	3.19969	107.949	1.64761	87.3789	5.75258	94.151	8.90295	93.9073	8.03959	120.203	3.59128	70.6847	2.99145	70.4237	1.05138	107.24	6.90027	113.332	6.16741	112.779
	PFHpA	Matrix Spike	N/A	N/A	39.043	5.24725	102.668	4.77425	38.7101	5.32318	99.7083	3.44157	N/A	N/A	N/A	N/A	N/A	N/A	N/A	N/A	N/A	N/A	N/A	N/A	N/A	N/A	N/A	N/A	N/A	N/A	N/A	N/A	82.5938	0.49343	90.414	2.57043	88.4734	4.34065	N/A	N/A	N/A	N/A	N/A	N/A	N/A	N/A	103.587	5.05036	102.517
		13C4-PFHpA	90.5536	15.4633	79.7125	8.01617	77.9037	10.8612	94.4186	14.6455	82.5329	11.4455	5.76289	0.283855	61.5322	7.59323	64.3467	5.95291	52.7878	5.85945	60.8589	7.79399	80.4596	13.6091	87.9939	3.35234	99.1979	2.05637	108.407	1.30566	111.766	5.61226	138.583	21.5881	131.748	30.2555	135.151	28.2442	107.19	8.97564	51.9037	1.82376	82.8134	3.04858	98.4776	7.29674	84.8686	4.38572	111.936
	PFOA	Matrix Spike	N/A	N/A	53.4123	8.2608	80.9428	4.527	43.1404	3.97884	87.6061	2.08631	N/A	N/A	N/A	N/A	N/A	N/A	N/A	N/A	N/A	N/A	N/A	N/A	N/A	N/A	N/A	N/A	N/A	N/A	N/A	N/A	89.9697	5.34022	96.2236	2.24445	94.0074	9.11416	N/A	N/A	N/A	N/A	N/A	N/A	N/A	N/A	116.458	4.22644	103.603
		13C8-PFOA	78.6193	15.893	117.853	9.37981	89.9505	13.1622	94.7932	8.54905	92.5787	11.2268	11.3836	0.781189	91.2336	13.9176	57.7131	5.37422	76.2849	9.03271	62.8506	6.29754	81.8586	10.6362	75.1555	0.753052	86.6253	2.19322	90.0464	2.65111	101.343	1.8897	213.443	11.0191	204.946	20.3643	189.829	15.5317	116.813	3.77554	64.2491	1.72	87.5204	2.23108	121.51	2.16766	102.744	1.4165	110.895
	PFNA	Matrix Spike	N/A	N/A	59.0048	5.44216	82.1782	2.76582	54.439	6.72738	73.2885	3.06514	N/A	N/A	N/A	N/A	N/A	N/A	N/A	N/A	N/A	N/A	N/A	N/A	N/A	N/A	N/A	N/A	N/A	N/A	N/A	N/A	87.2009	8.78421	101.418	3.60362	92.6729	2.56718	N/A	N/A	N/A	N/A	N/A	N/A	N/A	N/A	97.0448	9.63707	94.5676
		13C9-PFNA	81.6876	15.2145	125.982	11.9758	107.93	13.9412	116.568	13.5364	108.111	19.4357	16.1819	1.08788	94.8784	13.0374	25.9031	3.20343	74.2215	9.47752	45.7428	6.34818	73.2228	10.629	75.408	1.13609	89.6105	1.02887	87.7268	5.55926	96.6591	3.06149	190.827	14.2323	188.941	28.079	129.267	13.0621	98.6216	2.96663	56.6322	3.03	73.6246	3.18057	97.5523	7.56602	96.8436	2.75251	95.9935
	PFDA	Matrix Spike	N/A	N/A	58.828	9.41711	77.5813	0.702663	48.4224	6.92482	74.0364	4.39088	N/A	N/A	N/A	N/A	N/A	N/A	N/A	N/A	N/A	N/A	N/A	N/A	N/A	N/A	N/A	N/A	N/A	N/A	N/A	N/A	84.6887	8.91049	109.747	11.6508	100.92	0.178361	N/A	N/A	N/A	N/A	N/A	N/A	N/A	N/A	101.901	3.86311	102.289
		13C6-PFDA	95.0056	19.0519	127.228	18.4995	107.346	18.3962	107.157	12.9018	108.783	20.481	26.582	1.47613	96.3615	16.7473	20.74	2.98096	63.4077	8.87431	81.8759	14.5644	80.9806	13.1426	93.4806	3.33345	106.999	2.50907	109.309	7.78527	120.643	5.4272	69.7432	5.37704	77.7003	12.2843	53.1474	12.4532	101.806	3.06758	37.9992	0.659661	60.8135	1.86847	107.3	5.90667	79.5894	0.960032	88.8748
	PFUdA	Matrix Spike	N/A	N/A	56.3929	9.25286	83.2122	2.50496	56.0061	10.5423	74.3726	3.86513	N/A	N/A	N/A	N/A	N/A	N/A	N/A	N/A	N/A	N/A	N/A	N/A	N/A	N/A	N/A	N/A	N/A	N/A	N/A	N/A	71.9519	9.10387	89.4791	2.0632	110.15	12.537	N/A	N/A	N/A	N/A	N/A	N/A	N/A	N/A	117.376	3.77391	103.887
		13C7-PFUnA	87.4532	15.4251	127.764	27.8782	110.888	16.1994	110.175	8.23233	108.951	19.0308	23.0504	1.16136	91.5138	12.131	35.5416	5.15512	63.8686	7.64565	78.3934	14.6213	95.7553	15.6108	83.8381	1.55507	89.613	0.290749	110.887	3.03695	121.661	4.88489	112.577	9.79583	111.607	15.1265	81.0066	21.3941	86.2763	7.05613	45.2316	0.75058	74.3668	0.662686	92.5672	0.96137	96.5748	4.48216	100.613
	PFDoA	Matrix Spike	N/A	N/A	49.0107	7.71229	83.7835	2.83866	35.2399	4.08369	76.384	0.143354	N/A	N/A	N/A	N/A	N/A	N/A	N/A	N/A	N/A	N/A	N/A	N/A	N/A	N/A	N/A	N/A	N/A	N/A	N/A	N/A	78.97	13.4432	97.6493	9.24359	101.41	4.0495	N/A	N/A	N/A	N/A	N/A	N/A	N/A	N/A	102.901	5.89684	107.948
		13C2-PFDoA	79.7719	14.4662	109.677	23.4894	100.587	18.82	71.8463	6.08233	71.455	13.2291	25.9973	3.27504	84.4068	9.20785	69.1461	10.6156	45.2569	4.8643	80.9513	12.0325	91.3685	15.8749	84.5193	3.92007	95.3265	3.69352	102.058	8.88574	123.522	8.43041	36.4362	3.96475	42.3514	7.64923	30.4558	8.2818	77.9152	4.35888	39.7256	2.38968	63.7307	0.72314	87.6213	6.0129	74.9904	1.87984	79.2432
	PFTrDA	Matrix Spike	N/A	N/A	43.5267	7.86836	49.3586	2.80137	47.3013	8.35056	54.8947	1.31498	N/A	N/A	N/A	N/A	N/A	N/A	N/A	N/A	N/A	N/A	N/A	N/A	N/A	N/A	N/A	N/A	N/A	N/A	N/A	N/A	139.044	16.9967	67.1814	13.419	94.133	20.967	N/A	N/A	N/A	N/A	N/A	N/A	N/A	N/A	113.226	10.3219	62.5833
		13C2-PFTeDA	N/A	N/A	N/A	N/A	N/A	N/A	N/A	N/A	N/A	N/A	N/A	N/A	N/A	N/A	N/A	N/A	N/A	N/A	N/A	N/A	N/A	N/A	N/A	N/A	N/A	N/A	N/A	N/A	N/A	N/A	N/A	N/A	N/A	N/A	N/A	N/A	N/A	N/A	N/A	N/A	N/A	N/A	N/A	N/A	N/A	N/A	N/A
	PFTeDA	Matrix Spike	N/A	N/A	43.2591	7.81998	76.2748	7.41198	47.0105	8.29922	77.4237	4.20486	N/A	N/A	N/A	N/A	N/A	N/A	N/A	N/A	N/A	N/A	N/A	N/A	N/A	N/A	N/A	N/A	N/A	N/A	N/A	N/A	84.9445	11.3563	86.0685	7.20218	118.709	7.53283	N/A	N/A	N/A	N/A	N/A	N/A	N/A	N/A	83.6735	0	91.3898
		13C2-PFTeDA	278.186	47.8683	90.8273	14.2261	121.494	9.97332	80.4793	4.39971	131.78	10.2489	114.137	9.41963	67.1533	9.98677	114.062	21.4075	36.7266	4.48029	268.128	42.6512	291.115	31.0705	279.347	21.4074	354.489	13.8393	347.042	29.9826	351.15	23.0263	18.2305	2.81059	32.0476	12.308	17.8726	3.75981	19.1496	2.24582	15.4757	1.46766	56.7959	5.91585	16.6948	1.81144	65.5584	1.16345	129.009
	PFBS	Matrix Spike	N/A	N/A	47.1145	5.36916	87.9502	5.35304	53.7844	6.69056	91.0583	6.9975	N/A	N/A	N/A	N/A	N/A	N/A	N/A	N/A	N/A	N/A	N/A	N/A	N/A	N/A	N/A	N/A	N/A	N/A	N/A	N/A	101.666	3.44587	104.553	5.59536	102.227	3.69917	N/A	N/A	N/A	N/A	N/A	N/A	N/A	N/A	95.3653	3.08434	94.2878
		13C3-PFBS	22.4817	2.11275	91.4531	9.55609	91.3962	13.1999	112.818	18.995	84.8034	11.1326	29.9534	1.56211	81.3986	10.5106	12.5278	1.94815	75.4719	9.11863	18.67	3.38838	27.711	3.60607	19.3571	2.23804	20.7072	1.95105	23.3996	1.51387	26.4644	3.06148	65.3649	5.33988	83.2486	8.87924	86.0309	4.73305	104.276	3.17366	51.8355	1.5488	86.3965	3.44876	107.063	2.54526	94.0139	2.20279	98.7599
	PFPeS	Matrix Spike	N/A	N/A	47.3285	5.39354	78.2186	3.88928	54.0286	6.72095	92.3405	4.53578	N/A	N/A	N/A	N/A	N/A	N/A	N/A	N/A	N/A	N/A	N/A	N/A	N/A	N/A	N/A	N/A	N/A	N/A	N/A	N/A	106.58	17.3589	86.9387	31.8549	82.5282	7.19619	N/A	N/A	N/A	N/A	N/A	N/A	N/A	N/A	92.3798	3.10466	97.1243
		13C3-PFBS	N/A	N/A	N/A	N/A	N/A	N/A	N/A	N/A	N/A	N/A	N/A	N/A	N/A	N/A	N/A	N/A	N/A	N/A	N/A	N/A	N/A	N/A	N/A	N/A	N/A	N/A	N/A	N/A	N/A	N/A	N/A	N/A	N/A	N/A	N/A	N/A	N/A	N/A	N/A	N/A	N/A	N/A	N/A	N/A	N/A	N/A	N/A
	PFHxS	Matrix Spike	N/A	N/A	46.4408	7.44299	89.7031	1.52584	44.9487	8.70048	90.5028	4.54271	N/A	N/A	N/A	N/A	N/A	N/A	N/A	N/A	N/A	N/A	N/A	N/A	N/A	N/A	N/A	N/A	N/A	N/A	N/A	N/A	1.55471	2.19869	59.1239	16.9155	0	0	N/A	N/A	N/A	N/A	N/A	N/A	N/A	N/A	102.266	7.56563	93.7236
		13C3-PFHxS	92.4349	16.3614	91.9639	11.2264	71.4763	12.2146	108.531	19.3636	81.8204	10.8078	48.8249	3.24217	71.139	9.49023	84.4716	12.2013	79.0242	10.0163	70.4046	9.00669	111.994	18.434	94.7877	3.62428	113.215	2.17383	113.567	4.22079	124.21	6.42569	118.692	9.90695	117.314	14.1396	83.3629	17.1058	82.3601	1.76291	41.2036	0.874037	63.7705	4.24779	80.6164	4.9019	72.1874	4.64391	96.834
	PFHpS	Matrix Spike	N/A	N/A	56.6878	7.76079	95.8362	6.7142	49.2782	7.21614	75.1649	3.95106	N/A	N/A	N/A	N/A	N/A	N/A	N/A	N/A	N/A	N/A	N/A	N/A	N/A	N/A	N/A	N/A	N/A	N/A	N/A	N/A	82.5938	6.31968	109.294	10.6084	110.366	3.90567	N/A	N/A	N/A	N/A	N/A	N/A	N/A	N/A	92.6977	2.06102	103.017
		13C3-PFHxS	N/A	N/A	N/A	N/A	N/A	N/A	N/A	N/A	N/A	N/A	N/A	N/A	N/A	N/A	N/A	N/A	N/A	N/A	N/A	N/A	N/A	N/A	N/A	N/A	N/A		N/A	N/A	N/A	N/A	N/A	N/A	N/A	N/A	N/A	N/A	N/A	N/A	N/A	N/A	N/A	N/A	N/A	N/A	N/A	N/A	N/A
	PFOS	Matrix Spike	N/A	N/A	57.7314	7.90366	90.4652	2.65736	50.1854	7.34899	73.9353	0.668959	N/A	N/A	N/A	N/A	N/A	N/A	N/A	N/A	N/A	N/A	N/A	N/A	N/A	N/A	N/A	N/A	N/A	N/A	N/A	N/A	84.6887	8.91049	109.747	11.6508	100.92	0.178361	N/A	N/A	N/A	N/A	N/A	N/A	N/A	N/A	91.3603	1.83058	88.3276
		13C8-PFOS	79.8492	18.8813	117.287	12.9142	86.2475	14.7222	119.515	17.6684	88.0092	13.1271	68.2733	3.04914	87.1695	13.9041	39.5413	3.93491	69.4463	11.2118	59.3755	14.462	114.396	27.5503	87.6839	10.4626	101.183	2.44805	91.648	2.81324	105.802	5.29202	69.7432	5.37704	77.7003	12.2843	53.1474	12.4532	96.6615	5.53602	48.0599	2.30729	68.6655	3.14678	115.256	4.29683	92.871	1.1153	96.1571
	PFNS	Matrix Spike	N/A	N/A	56.0076	7.66766	101.109	3.46371	48.6869	7.12955	84.4957	5.44513	N/A	N/A	N/A	N/A	N/A	N/A	N/A	N/A	N/A	N/A	N/A	N/A	N/A	N/A	N/A	N/A	N/A	N/A	N/A	N/A	82.9983	6.09501	98.6282	8.69355	92.8882	0.708975	N/A	N/A	N/A	N/A	N/A	N/A	N/A	N/A	89.0627	5.22243	90.276
		13C8-PFOS	N/A	N/A	N/A	N/A	N/A	N/A	N/A	N/A	N/A	N/A	N/A	N/A	N/A	N/A	N/A	N/A	N/A	N/A	N/A	N/A	N/A	N/A	N/A	N/A	N/A		N/A	N/A	N/A	N/A	N/A	N/A	N/A	N/A	N/A	N/A	N/A	N/A	N/A	N/A	N/A	N/A	N/A	N/A	N/A	N/A	N/A
	PFDS	Matrix Spike	N/A	N/A	55.5598	7.60636	116.796	6.14799	48.2976	7.07255	88.7832	2.45085	N/A	N/A	N/A	N/A	N/A	N/A	N/A	N/A	N/A	N/A	N/A	N/A	N/A	N/A	N/A	N/A	N/A	N/A	N/A	N/A	63.492	6.78792	58.0489	9.96955	67.446	1.16985	N/A	N/A	N/A	N/A	N/A	N/A	N/A	N/A	86.3297	2.87284	88.9543
		13C8-PFOS	N/A	N/A	N/A	N/A	N/A	N/A	N/A	N/A	N/A	N/A	N/A	N/A	N/A	N/A	N/A	N/A	N/A	N/A	N/A	N/A	N/A	N/A	N/A	N/A	N/A		N/A	N/A	N/A	N/A	N/A	N/A	N/A	N/A	N/A	N/A	N/A	N/A	N/A	N/A	N/A	N/A	N/A	N/A	N/A	N/A	N/A
	FOSA	Matrix Spike	N/A	N/A	36.8058	3.35687	80.8815	5.48582	28.0088	4.89485	70.6617	0.778406	N/A	N/A	N/A	N/A	N/A	N/A	N/A	N/A	N/A	N/A	N/A	N/A	N/A	N/A	N/A	N/A	N/A	N/A	N/A	N/A	77.5097	8.87336	85.3206	10.9259	96.885	9.15583	N/A	N/A	N/A	N/A	N/A	N/A	N/A	N/A	96.3491	2.16537	93.0695
		13C8-FOSA	50.8426	7.33195	91.0002	9.35284	92.2941	11.387	62.2671	7.18154	87.7888	12.9927	4.21883	0.115692	60.2333	11.3398	16.8864	2.64677	17.7449	3.30574	14.4097	1.40473	47.7164	7.38288	26.0839	0.494186	48.3501	1.06549	58.8149	2.38089	68.8159	1.00391	50.0585	7.37269	57.911	17.3353	9.3242	2.70018	77.1982	1.87064	59.2427	2.02424	30.8246	1.72205	69.7324	4.88093	69.5957	2.35527	75.2962
	EtFOSAA	Matrix Spike	N/A	N/A	60.8567	9.93964	84.2798	7.68552	56.6457	11.9509	78.3984	6.06431	N/A	N/A	N/A	N/A	N/A	N/A	N/A	N/A	N/A	N/A	N/A	N/A	N/A	N/A	N/A	N/A	N/A	N/A	N/A	N/A	73.52	16.4447	88.4505	10.6662	108.703	11.3905	N/A	N/A	N/A	N/A	N/A	N/A	N/A	N/A	95.4626	3.78795	94.6197
		d3-EtFOSAA	116.91	22.1107	141.151	25.572	160.76	11.3904	111.263	20.8734	160.731	20.173	55.6422	4.86194	101.072	18.9937	60.0692	4.09607	61.789	8.77972	104.532	19.183	119.208	13.4383	82.8922	3.65906	110.766	5.92099	159.217	3.85212	161.849	7.75196	143.252	13.4919	151.481	18.0528	100.471	21.5312	107.217	6.7576	64.4579	2.4537	93.0569	7.34313	142.147	7.60363	122.825	2.67662	96.8498
	MeFOSAA	Matrix Spike	N/A	N/A	76.1519	9.83241	78.1584	4.23514	72.0529	13.5094	75.8664	4.33365	N/A	N/A	N/A	N/A	N/A	N/A	N/A	N/A	N/A	N/A	N/A	N/A	N/A	N/A	N/A	N/A	N/A	N/A	N/A	N/A	78.3466	7.65697	97.9831	4.92079	103.979	2.63816	N/A	N/A	N/A	N/A	N/A	N/A	N/A	N/A	93.9668	2.83445	90.4828
		d5-MeFOSAA	114.582	15.1238	161.414	21.973	127.873	16.0882	151.553	27.1088	132.601	20.9279	49.9224	0.399852	97.9095	17.9858	29.1276	1.50327	50.131	5.84374	76.6837	10.9103	103.32	18.4231	57.3428	2.52375	112.35	3.5647	138.396	2.64861	140.519	13.4825	145.627	8.48878	136.783	16.924	96.5007	17.1218	101.809	7.47513	50.6168	3.55289	92.8691	3.64863	118.551	4.68931	93.3814	4.90803	91.2122
	4:2 FtS	Matrix Spike	N/A	N/A	69.1429	11.0515	94.2128	4.32357	80.0737	9.49155	91.1455	3.74004	N/A	N/A	N/A	N/A	N/A	N/A	N/A	N/A	N/A	N/A	N/A	N/A	N/A	N/A	N/A	N/A	N/A	N/A	N/A	N/A	0	0	85.052	1.47582	84.1623	1.16967	N/A	N/A	N/A	N/A	N/A	N/A	N/A	N/A	83.0322	3.49049	87.3567
		13C2-4:2 FtS	76.7025	5.72587	146.326	20.0648	203.451	32.3211	173.228	26.2785	204.746	34.9391	36.1225	4.74252	126.719	19.6199	97.3999	10.9983	139.177	18.6803	128.72	22.9836	160.338	16.5064	134.145	4.72262	139.466	7.754	136.679	1.47992	156.965	4.6306	3.51969	2.52437	73.4299	32.8226	68.7728	26.189	239.565	39.3551	115.577	3.99125	153.366	9.04848	138.813	2.49363	165.415	3.62191	142.263
	6:2 FtS	Matrix Spike	N/A	N/A	188.014	25.0506	158.974	8.57717	173.464	21.4683	94.1645	15.1297	N/A	N/A	N/A	N/A	N/A	N/A	N/A	N/A	N/A	N/A	N/A	N/A	N/A	N/A	N/A	N/A	N/A	N/A	N/A	N/A	93.8997	5.47321	95.3532	3.93717	92.126	6.71881	N/A	N/A	N/A	N/A	N/A	N/A	N/A	N/A	112.497	13.246	105.192
		13C2-6:2 FtS	301.467	44.8111	429.036	53.5857	389.354	55.0955	438.965	49.4013	400.222	59.9454	145.766	9.05977	353.051	54.0752	278.787	51.1641	259.063	32.963	285.823	38.0672	282.674	47.5811	283.562	14.208	334.212	8.8332	333.672	36.1218	364.163	9.14999	173.562	8.09679	172.393	18.0014	179.368	15.5891	268.6	31.6972	141.531	14.343	157.331	24.5915	265.623	23.0182	204.234	19.2324	179.431
	8:2 FtS	Matrix Spike	N/A	N/A	162.468	21.2527	80.8447	8.57316	142.72	28.2283	80.6223	1.26223	N/A	N/A	N/A	N/A	N/A	N/A	N/A	N/A	N/A	N/A	N/A	N/A	N/A	N/A	N/A	N/A	N/A	N/A	N/A	N/A	85.6048	5.94933	113.348	6.67933	123.753	7.13064	N/A	N/A	N/A	N/A	N/A	N/A	N/A	N/A	101.683	12.3114	89.1728
		13C2-8:2 FtS	295.744	59.2686	339.346	46.5626	275.398	49.1961	298.532	48.7658	287.849	42.3078	168.634	12.1726	251.514	45.9494	68.2794	17.9404	175.888	20.6226	303.869	38.7385	235.378	38.8932	314.225	17.5365	353.541	22.6408	362.14	14.0967	385.74	8.46902	116.253	14.6273	104.758	13.338	82.3874	13.0598	186.233	37.0935	76.6451	2.86381	129.449	4.45409	277.846	19.7731	111.11	11.0808	100.525
[truncated: 4 more columns]

## Sheet: Table S8b
	Table S8b. IS and MS recoveries (%) for animal tissue extractions using the MTBE extraction method.
	PFAS Tested		This Study				Literature
			Dried Earthworm		Wet Turkey Liver
			Avg Recoveries (%)	STD	Avg Recoveries (%)	STD	All matrices	Citations (Matrix Extracted)
	PFBA	Matrix Spike	69.4635	2.9683	95.1575	1.64683	N/A	N/A
		13C4-PFBA	76.54	5.15251	31.3547	6.10109	N/A	N/A
	PFPeA	Matrix Spike	63.1414	3.60368	102.891	10.1519	N/A	N/A
		13C5-PFPeA	10.0512	0.344217	31.6872	7.56674	N/A	N/A
	PFHxA	Matrix Spike	77.0094	4.13141	103.18	0.794387	43.1-77	Leo W.Y Yeung, 2006(human blood); Gulkowska, 2006 (fish, shrimp, crab, molluscs, clams, mussels and oyster)
		13C5-PFHxA	29.7493	2.97521	54.1295	9.92544	N/A
	PFHpA	Matrix Spike	88.4826	5.01277	94.7921	10.9014	56-186	Pan, 2010 (human blood); Zhang, 2010(b)(grocery meat, blood cake, liver, egg);Gulkowska, 2006 (fish, shrimp, crab, molluscs, clams, mussels and oyster);
		13C4-PFHpA	3.11213	0.3426	34.5371	6.09653	N/A
	PFOA	Matrix Spike	77.9863	1.64473	90.2965	4.91212	57-168	Pan, 2010 (blood); Leo W.Y Yeung, 2006(blood); Hansen, 2001 (sera and liver); Kannan, 2004; Spliethoff, 2008(blood); Zhang, 2010(b)(grocery meat, blood cake, liver, egg);Martin, 2004 (fish); Gulkowska, 2006 (fish);Yoo, 2008 (egg yolk)
		13C8-PFOA	60.7061	8.55716	44.0065	8.63837	80-178	Zhang, 2010(a)(human blood) Zhang, 2010 (b)(grocery meat, blood cake, liver, egg);Spliethoff, 2008 (human blood);Yoo, 2008 (egg yolk)
	PFNA	Matrix Spike	70.5896	1.57842	93.4503	3.80177	71-199	Pan, 2010 (human blood); Leo W.Y Yeung, 2006(human blood); Zhang, 2010(b)(grocery meat, blood cake, liver, egg); Martin, 2004(fish);Gulkowska, 2006 (fish, shrimp, crab, molluscs, clams, mussels and oyster);Yoo, 2008 (egg yolk)
		13C9-PFNA	106.573	10.0345	57.9576	10.9598	139-179	Zhang, 2010(a)(human blood);Zhang, 2010 (b)(grocery meat, blood cake, liver, egg)
	PFDA	Matrix Spike	70.8861	3.56421	100.735	6.36394	80.4-128	Leo W.Y Yeung, 2006(human blood); Martin, 2004 (fish);Gulkowska, 2006 (fish, shrimp, crab, molluscs, clams, mussels and oyster);Yoo, 2008 (egg yolk)
		13C6-PFDA	101.376	11.0582	48.7466	8.8656	153-207	Zhang, 2010(a)(human blood); Zhang, 2010 (b)(grocery meat, blood cake, liver, egg)
	PFUdA	Matrix Spike	71.6521	2.50632	98.2823	6.29725	26-136	Pan, 2010 (human blood); Leo W.Y Yeung, 2006(human blood); Zhang, 2010(b)(grocery meat, blood cake, liver, egg); Martin, 2004 (fish);Gulkowska, 2006 (fish, shrimp, crab, molluscs, clams, mussels and oyster); Yoo, 2008 (egg yolk)
		13C7-PFUnA	90.8185	5.80206	45.3181	12.8666	N/A
	PFDoA	Matrix Spike	77.6785	1.19529	103.295	11.629	39-177	Pan, 2010 (human blood); Leo W.Y Yeung, 2006(human blood); Zhang, 2010(b)(grocery meat, blood, liver, egg); Martin, 2004 (fish); Yoo, 2008 (egg yolk)
		13C2-PFDoA	59.293	3.83054	46.9489	7.91565	N/A
	PFTrDA	Matrix Spike	72.8416	2.12818	161.353	21.2018	85-147	Pan, 2010 (human blood); Martin, 2004 (fish)
		13C2-PFTeDA	N/A	N/A	N/A	N/A	N/A	N/A
	PFTeDA	Matrix Spike	61.691	2.37631	92.9966	3.89907	N/A	N/A
		13C2-PFTeDA	76.594	10.7044	28.0965	5.25553	N/A	N/A
	PFBS	Matrix Spike	67.7172	6.25317	95.233	6.18971	53.3-80.2	Leo W.Y Yeung, 2006(human blood);Gulkowska, 2006 (fish, shrimp, crab, molluscs, clams, mussels and oyster); Taniyasu, 2003(fish and bird's blood and liver)
		13C3-PFBS	10.9242	0.78844	33.0225	4.69984	86	Spliethoff, 2008(human blood)
	PFPeS	Matrix Spike	334.853	26.8366	150.754	12.5543	N/A	N/A
		13C3-PFBS	N/A	N/A	N/A	N/A	N/A	N/A
	PFHxS	Matrix Spike	73.6801	8.59113	110.823	2.46766	28-127	Pan, 2010 (human blood); Leo W.Y Yeung, 2006(human blood); Hansen, 2001 (sera and liver); Kannan, 2004(human blood); Spliethoff, 2008(human blood); Zhang, 2010(b)(grocery meat, blood, liver, egg);Gulkowska, 2006 (fish, shrimp, crab, molluscs, clams, mussels and oyster);Taniyasu, 2003(fish and bird's blood and liver); Yoo, 2008 (egg yolk)
		13C3-PFHxS	19.7365	1.55373	40.0534	5.50607	N/A
	PFHpS	Matrix Spike	65.3298	1.33945	89.0328	3.70384	N/A	N/A
		13C3-PFHxS	N/A	N/A	N/A	N/A	N/A	N/A
	PFOS	Matrix Spike	66.5414	1.99597	91.014	8.11028	48-128	Pan, 2010 (human blood); Leo W.Y Yeung, 2006(human blood); Hansen, 2001(sera and liver); Kannan, 2004(human blood); Spliethoff, 2008 (human blood); Zhang, 2010(b)(grocery meat, blood, liver, egg); Martin, 2004 (fish); Yoo, 2008 (egg yolk)
		13C8-PFOS	113.08	14.0352	51.5507	8.93587	82-103	Zhang, 2010(a)(human blood);Zhang, 2010 (b)(grocery meat, blood, liver, egg); Spliethoff, 2008 (human blood); Taniyasu, 2003(fish and bird's blood and liver);Yoo, 2008 (egg yolk)
	PFNS	Matrix Spike	64.8561	1.9023	92.1951	12.8142	N/A	N/A
		13C8-PFOS	N/A	N/A	N/A	N/A	N/A	N/A
	PFDS	Matrix Spike	58.4101	0.619223	98.891	1.88034	55-105	Zhang, 2010(b)(grocery meat, blood, liver, egg); Yoo, 2008 (egg yolk)
		13C8-PFOS	N/A	N/A	N/A	N/A	N/A
	FOSA	Matrix Spike	62.918	2.6732	110.275	8.24359	30-120	Leo W.Y Yeung, 2006 (human blood); Hansen, 2001 (sera and liver); Kannan, 2004 (human blood); Spliethoff, 2008 (human blood); Zhang, 2010(b) (grocery meat, blood, liver, egg); Martin, 2004(fish); Yoo, 2008 (egg yolk)
		13C8-FOSA	59.8714	3.87107	56.7238	8.54222	N/A
	EtFOSAA	Matrix Spike	65.891	7.07697	108.334	18.1309	N/A	N/A
		d3-EtFOSAA	80.4079	9.96285	64.1431	10.7669	N/A	N/A
	MeFOSAA	Matrix Spike	61.6862	2.28927	99.0501	8.44339	N/A	N/A
		d5-MeFOSAA	133.137	15.8376	75.3863	12.0807	N/A	N/A
	4:2 FtS	Matrix Spike	57.2879	8.27388	113.701	6.72555	N/A	N/A
		13C2-4:2 FtS	7.58843	2.13357	69.7989	12.0018	N/A	N/A
	6:2 FtS	Matrix Spike	58.2118	2.65512	200.695	24.5542	N/A	N/A
		13C2-6:2 FtS	156.544	35.5191	117.603	17.297	N/A	N/A
	8:2 FtS	Matrix Spike	68.4633	5.37441	100.856	7.03657	N/A	N/A
		13C2-8:2 FtS	225.3	14.6267	119.312	20.4658	N/A	N/A

## Sheet: Table S9a
	Table S9a. IS and MS recoveries (%) for animal tissues using the MeOH method.
	PFAS Tested		This study												Literature
			Wet Rabbit Muscle		Dried Rabbit Muscle		Wet Guinea Pig Muscle		Wet Guinea Pig Liver		Wet Turkey Liver		Beef Baby Food		All matrices	Citations (Matrix)
			Avg Recoveries (%)	STD	Avg Recoveries (%)	STD	Avg Recoveries (%)	STD	Avg Recoveries (%)	STD	Avg Recoveries (%)	STD	Avg Recoveries (%)	STD
	PFBA	Matrix Spike	104.811	1.52379	101.912	1.30633	86.3545	1.15796	82.1692	0.628848	98.0659	3.66453	94.6202	0.990165	83-93	Zhou, 2013 (fish)
		13C4-PFBA	32.8191	2.54743	85.2666	2.26066	54.5344	0.776506	47.5554	3.91203	26.9525	2.7561	78.088	3.0876	74-100
	PFPeA	Matrix Spike	105.173	3.2836	95.9596	2.18336	94.6369	5.0157	83.4826	3.74322	100.7	3.16019	101.109	3.71003	83-91	Zhou, 2013 (fish)
		13C5-PFPeA	58.1142	5.57109	87.977	1.77272	65.4743	1.21487	40.2008	2.35725	37.151	3.10636	101.048	3.3899	N/A
	PFHxA	Matrix Spike	112.836	12.3894	95.4693	2.99859	109.886	2.94446	115.637	1.75786	108.661	10.0089	100.353	4.24315	100-112	Zhou, 2013 (fish)
		13C5-PFHxA	70.3102	6.68289	83.6865	1.20879	74.2653	2.46369	37.6813	1.81531	40.059	4.02146	118.779	1.55296	N/A
	PFHpA	Matrix Spike	130.95	5.27976	96.7059	0.714136	130.945	1.20392	129.394	7.2528	103.858	4.49721	100.72	4.54412	107-111	Zhou, 2013 (fish)
		13C4-PFHpA	69.0698	7.8362	86.2144	1.2206	57.3891	3.95293	29.4583	2.71314	39.0157	5.44903	121.95	6.89767	N/A
	PFOA	Matrix Spike	121.456	6.63505	110.48	5.94759	130.209	5.49706	128.95	7.0783	101.235	6.83256	113.626	4.22894	94-102	Zhou, 2013 (fish)
		13C8-PFOA	74.1357	8.24164	86.0332	5.63796	87.6363	3.324	59.9189	2.99712	15.023	1.67197	122.082	4.71196	85-105
	PFNA	Matrix Spike	91.5705	10.2267	109.437	3.67096	127.453	3.92836	131.443	10.91	96.3349	2.49015	107.74	4.77787	101-113	Zhou, 2013 (fish)
		13C9-PFNA	70.949	7.87557	78.3796	3.55678	95.2214	2.57822	73.3825	2.43367	66.2747	13.0822	100.85	3.62147	N/A
	PFDA	Matrix Spike	102.685	5.99765	89.3793	6.57693	121.036	7.09821	107.957	5.5757	102.186	1.84088	96.4561	4.36169	100	Zhou, 2013 (fish)
		13C6-PFDA	79.7582	6.26586	73.0209	5.93836	99.9637	10.6794	97.7595	7.29879	66.6514	14.2455	98.4996	3.72938	66
	PFUdA	Matrix Spike	102.204	6.71511	103.082	9.39007	124.407	8.76297	113.303	5.64848	102.458	13.229	100.842	5.7017	98-108	Zhou, 2013 (fish)
		13C7-PFUnA	69.9691	7.55801	77.0153	3.98448	91.7869	7.86327	83.6121	10.1139	59.9027	12.216	96.0493	2.20766	N/A
	PFDoA	Matrix Spike	97.2511	6.93718	97.0697	9.49479	112.263	3.37672	97.1773	6.99603	104.993	6.33201	92.5994	9.62501	82-108	Zhou, 2013 (fish)
		13C2-PFDoA	45.3696	2.51496	81.0646	5.61977	75.084	10.1032	89.1359	22.643	60.1116	15.2605	45.4371	7.38104	81-103
	PFTrDA	Matrix Spike	65.595	8.71684	102.329	20.4531	39.5499	3.30311	46.0661	4.57768	215.282	13.3638	43.9296	5.1047	76-82	Zhou, 2013 (fish)
		13C2-PFTeDA	N/A	N/A	N/A	N/A	N/A	N/A	N/A	N/A	N/A	N/A	N/A	N/A	N/A
	PFTeDA	Matrix Spike	81.7693	3.72118	102.077	2.59187	90.5685	1.80794	84.4757	5.72195	111.646	5.26877	85.3742	2.27114	N/A	N/A
		13C2-PFTeDA	31.5719	4.824	58.3125	6.48552	153.336	5.15732	139.581	23.6356	21.5852	2.09759	65.2862	4.65292	N/A	N/A
	PFBS	Matrix Spike	386.534	20.4346	88.776	1.67997	81.2683	2.36982	80.883	0.182816	79.9742	2.4074	89.444	7.36616	86-110	Zhou, 2013 (fish)
		13C3-PFBS	62.1644	8.29538	90.9322	2.9432	81.972	5.11096	77.6847	2.4615	65.6985	12.8294	95.628	2.42718	N/A
	PFPeS	Matrix Spike	115.507	2.68863	91.536	0.915209	88.6312	7.81866	92.85	4.11594	104.002	4.36335	82.4237	8.28782	N/A	N/A
		13C3-PFBS	N/A	N/A	N/A	N/A	N/A	N/A	N/A	N/A	N/A	N/A	N/A	N/A	N/A	N/A
	PFHxS	Matrix Spike	94.1965	5.21396	85.0347	2.13227	84.2818	1.20719	84.2395	4.39179	103.731	5.57448	96.5378	0.513553	91-111	Zhou, 2013 (fish)
		13C3-PFHxS	62.9282	7.34307	96.3288	2.39185	77.424	5.50004	67.1599	3.98082	63.1516	12.4319	98.3839	3.07766	N/A
	PFHpS	Matrix Spike	86.3636	5.06877	103.813	2.72843	96.8013	4.42132	86.3258	2.52819	63.7051	4.82325	80.9506	4.96241	N/A	N/A
		13C3-PFHxS	N/A	N/A	N/A	N/A	N/A	N/A	N/A	N/A	N/A	N/A	N/A	N/A	N/A	N/A
	PFOS	Matrix Spike	88.8432	3.70562	0.0b	0	73.6504	2.14767	0.0b	0	61	4.08	83.6498	2.40908	88-101	Tomy, 2005 (fish); Houde, 2008 (fish); Zhou, 2013 (fish)
		13C8-PFOS	70.3084	8.17297	117.567	1.35911	102.663	1.87603	97.5056	2.29942	72.6518	12.8927	97.6201	1.20097	128	Tomy, 2005 (fish)
	PFNS	Matrix Spike	100.637	3.46982	93.9131	1.29277	91.254	5.47391	76.805	3.29682	97.0868	3.66411	99.349	4.55507	N/A	N/A
		13C8-PFOS	N/A	N/A	N/A	N/A	N/A	N/A	N/A	N/A	N/A	N/A	N/A	N/A	N/A	N/A
	PFDS	Matrix Spike	93.0084	5.11856	101.13	4.21289	103.65	5.26747	87.3327	2.0957	105.977	0.874392	83.4181	1.66749	N/A	N/A
		13C8-PFOS	N/A	N/A	N/A	N/A	N/A	N/A	N/A	N/A	N/A	N/A	N/A	N/A	N/A	N/A
	FOSA	Matrix Spike	88.1361	4.83425	93.7345	1.54107	92.6627	5.67739	89.4346	4.67673	105.705	8.42278	85.2334	5.49066	N/A	N/A
		13C8-FOSA	25.4105	2.14146	56.8793	1.75621	71.747	3.9483	58.8448	6.29838	35.9587	5.81094	85.6739	1.98564	N/A	N/A
	EtFOSAA	Matrix Spike	98.0757	0.93966	102.278	0.55888	84.0051	3.58704	76.6753	2.39554	102.477	7.33276	82.8758	0.718376	N/A	N/A
		d3-EtFOSAA	71.7208	9.05846	108.567	2.89885	144.403	12.82	96.0068	13.933	77.121	7.44724	96.4836	3.67473	N/A	N/A
	MeFOSAA	Matrix Spike	87.1017	1.20052	104.832	2.74769	92.7756	1.40131	84.8364	2.72267	109.655	5.27351	79.1629	7.92864	N/A	N/A
		d5-MeFOSAA	76.7964	3.30783	125.445	2.15912	137.439	6.93724	97.2609	8.54798	91.7995	14.734	91.9399	3.87423	N/A	N/A
	4:2 FtS	Matrix Spike	90.8354	13.6885	92.1507	6.4371	92.1964	9.84224	90.1904	6.2738	137.589	2.26671	93.7077	5.98894	N/A	N/A
		13C2-4:2 FtS	117.34	14.1895	149.942	8.54859	120.244	1.13175	94.4175	7.37131	155.431	25.0887	109.227	6.25367	N/A	N/A
	6:2 FtS	Matrix Spike	103.932	2.77617	89.4063	13.24	88.8632	1.43175	86.9529	2.96975	110.741	20.6726	106.174	16.407	N/A	N/A
		13C2-6:2 FtS	141.939	21.4944	39.2112	6.48739	316.628	6.19826	296.03	15.8629	74.4445	11.8758	168.026	21.8815	N/A	N/A
	8:2 FtS	Matrix Spike	90.5324	3.64447	93.3294	2.97257	97.4737	1.34413	94.7138	0.14127	115.92	1.32521	80.8914	6.87356	N/A	N/A
		13C2-8:2 FtS	167.519	25.2595	186.056	0.214951	340.851	12.4451	335.267	12.3	168.459	32.0328	132.166	8.42759	N/A	N/A
	b: Background concentration was >> matrix spike, which prohibited effective recovery.

## Sheet: Table S9b
	Table S9b. IS and MS recoveries (%) for earthworm extractions using the MeOH (basic MeOH) extraction method.
	PFAS Tested		This Study		Literature
			Dried Earthworm
			Avg Recoveries (%)	STD	All matrices	Citations (Matrix Extracted)
	PFBA	Matrix Spike	59.3434	9.70984	66-194	Zhou, 2013 (fish); So, 2004 (blood and liver); Meng, 2022 (fruits and vegetables)
		13C4-PFBA	5.35044	1.2809	74-100	Zhou, 2013 (fish)
	PFPeA	Matrix Spike	69.0722	4.5198	71-120	Zhou, 2013 (fish); So, 2004 (blood and liver);Zhao,2014(earthworms);Meng, 2022 (fruits and vegetables)
		13C5-PFPeA	8.28083	1.47683	N/A
	PFHxA	Matrix Spike	85.8966	3.73711	51.8-113	Zhou, 2013 (fish); So, 2004 (blood and liver);So, 2006 (Mussels and Oyster);Zhao,2014(earthworms); Meng, 2022 (fruits and vegetables)
		13C5-PFHxA	17.2778	0.509956	N/A
	PFHpA	Matrix Spike	137.536	13.231	61.1-111	Zhou, 2013 (fish); So, 2004 (blood and liver);So, 2006 (Mussels and Oyster);Zhao,2014(earthworms); Meng, 2022 (fruits and vegetables)
		13C4-PFHpA	2.6422	0.18288	N/A
	PFOA	Matrix Spike	78.9109	6.61793	43-250.7	Zhou, 2013 (fish); So, 2004 (blood and liver);So, 2006 (Mussels and Oyster);Zhao,2014(earthworms); Meng, 2022 (fruits and vegetables)
		13C8-PFOA	28.7748	4.38847	85-105	Zhou, 2013 (fish); So, 2004 (blood and liver)
	PFNA	Matrix Spike	70.1943	2.77565	50.8-121	Zhou, 2013 (fish); So, 2004 (blood and liver);So, 2006 (Mussels and Oyster);Zhao,2014(earthworms); Meng, 2022 (fruits and vegetables)
		13C9-PFNA	50.4772	3.39941	N/A
	PFDA	Matrix Spike	73.5033	3.84347	69-116	Zhou, 2013 (fish); So, 2004 (blood and liver);So, 2006 (Mussels and Oyster);Zhao,2014(earthworms); Meng, 2022 (fruits and vegetables)
		13C6-PFDA	50.001	3.54283	N/A
	PFUdA	Matrix Spike	65.514	2.69298	9.2-108	Zhou, 2013 (fish); So, 2004 (blood and liver);So, 2006 (Mussels and Oyster);Zhao,2014(earthworms); Meng, 2022 (fruits and vegetables)
		13C7-PFUnA	44.1955	1.22578	N/A
	PFDoA	Matrix Spike	0	0	6.5-124	Zhou, 2013 (fish); So, 2004 (blood and liver);So, 2006 (Mussels and Oyster);Zhao,2014(earthworms); Meng, 2022 (fruits and vegetables)
		13C2-PFDoA	27.4781	2.80734	81-103	Zhou, 2013 (fish)
	PFTrDA	Matrix Spike	70.5261	11.0721	20-449	Zhou, 2013 (fish);Meng, 2022 (fruits and vegetables)
		13C2-PFTeDA	N/A	N/A	N/A
	PFTeDA	Matrix Spike	66.1165	5.86398	40-111	So, 2004 (blood and liver);Meng, 2022 (fruits and vegetables)
		13C2-PFTeDA	67.7292	9.85195	N/A
	PFBS	Matrix Spike	68.0996	4.60047	77.4-142	Zhou, 2013 (fish); So, 2004 (blood and liver);So, 2006 (Mussels and Oyster);Zhao,2014(earthworms); Meng, 2022 (fruits and vegetables)
		13C3-PFBS	19.2679	0.490339	N/A
	PFPeS	Matrix Spike	99.0415	6.32527	75-132	Meng, 2022 (fruits and vegetables)
		13C3-PFBS	N/A	N/A	N/A	N/A
	PFHxS	Matrix Spike	70.0034	0	88-110	Zhou, 2013 (fish);Zhao,2014(earthworms);So, 2004 (blood and liver); So, 2006 (Mussels and Oyster);Meng, 2022 (fruits and vegetables)
		13C3-PFHxS	17.0654	0.656566	N/A
	PFHpS	Matrix Spike	70.0034	0	96-128	Meng, 2022 (fruits and vegetables)
		13C3-PFHxS	N/A	N/A	N/A	N/A
	PFOS	Matrix Spike	67.7737	1.71994	72.9-133	Zhou, 2013 (fish); So, 2004 (blood and liver);So, 2006 (Mussels and Oyster);Zhao,2014(earthworms); Meng, 2022 (fruits and vegetables)
		13C8-PFOS	79.0073	9.52522	95-109	Zhou, 2013 (fish)
	PFNS	Matrix Spike	61.141	2.32243	72-190	Meng, 2022 (fruits and vegetables)
		13C8-PFOS	N/A	N/A	N/A	N/A
	PFDS	Matrix Spike	58.7984	4.42299	63-326	Meng, 2022 (fruits and vegetables)
		13C8-PFOS	N/A	N/A	N/A	N/A
	FOSA	Matrix Spike	74.0027	8.51187	46.6-122	So, 2004 (blood and liver); So, 2006 (Mussels and Oyster);Meng, 2022 (fruits and vegetables)
		13C8-FOSA	33.1713	2.10578	N/A
	EtFOSAA	Matrix Spike	69.6928	2.03858	30-113	So, 2004 (blood and liver);Meng, 2022 (fruits and vegetables)
		d3-EtFOSAA	46.1487	2.95213	N/A
	MeFOSAA	Matrix Spike	58.2283	4.27797	84-126	Meng, 2022 (fruits and vegetables)
		d5-MeFOSAA	93.8112	12.5179	N/A	N/A
	4:2 FtS	Matrix Spike	53.0665	6.31122	49-120	Meng, 2022 (fruits and vegetables)
		13C2-4:2 FtS	10.2381	0.637449	N/A	N/A
	6:2 FtS	Matrix Spike	59.1618	1.84127	86-106	Meng, 2022 (fruits and vegetables)
		13C2-6:2 FtS	67.8482	3.86021	N/A	N/A
	8:2 FtS	Matrix Spike	68.7593	5.64979	87-110	Meng, 2022 (fruits and vegetables)
		13C2-8:2 FtS	126.217	13.7249	N/A	N/A

## Sheet: Table S10
	Table S10. Matrix Spiked Recoveries Comparison for aging spiking and direct spiking
	MTBE Method: 200 ng/L, aging spiking, using dried lettuce and radish shoots						MTBE Method: 200 ng/L, direct spiking, using dried organic lettuce and radish shoots						MTBE Method: 10 ng/L, aging spiking, using dried lettuce and radish shoots						MTBE Method: 10 ng/L, direct spiking, using dried organic lettuce and radish shoots
	Compounds	Lettuce	STD	Radish Shoot	STD		Compounds	Lettuce	STD	Radish Shoot	STD		Compounds	Lettuce	STD	Radish Shoot	STD		Compounds	Lettuce	STD	Radish Shoot	STD
	PFBA	133b	0.817856	126b	12.7105		PFBA	95	3.9413	205	6.94538		PFBA	843b	109.301	441b	311.5		PFBA	86.9206	10.0507	115.899	30.6506
	PFPeA	234b	31.2274	141b	14.867		PFPeA	89.1152	2.61366	88.7465	6.80027		PFPeA	2796b	223.595	697b	432.161		PFPeA	94.0405	8.58124	79.6158	14.3222
	PFHxA	138	13.3374	134.4	26.2404		PFHxA	119.965	4.22503	125.737	9.68576		PFHxA	458.592	260.237	357.933	187.67		PFHxA	151.445	18.6533	0	0
	PFHpA	2185b	72.677	160b	26.2848		PFHpA	82.5938	0.49343	88.4734	4.34065		PFHpA	41655b	6482.18	513b	259.536		PFHpA	15.289	7.07738	29.817	4.75025
	PFOA	19730b	3950.46	136b	17.7641		PFOA	89.9697	5.34022	94.0074	9.11416		PFOA	29359847b	4.08563e+07	559b	328.143		PFOA	73.6197	6.4248	78.6395	16.2945
	PFNA	1279b	84.0845	121b	18.2723		PFNA	87.2009	8.78421	100.916	11.8445		PFNA	26156b	2277.91	430b	242.522		PFNA	86.5891	4.3977	83.7684	23.026
	PFDA	88.9267	7.53924	62.4	9.57636		PFDA	84.6887	8.91049	120.347	27.4744		PFDA	86.5467	1.9764	83.1367	5.54811		PFDA	64.3454	16.7718	96.9913	60.0787
	PFUdA	74.4133	4.22457	59.35	11.2388		PFUdA	71.9519	9.10387	98.8884	18.9317		PFUdA	91.4667	8.95259	92.42	7.91678		PFUdA	79.2721	9.21027	84.7305	21.0107
	PFDoA	60	4.08248	54.4333	12.0953		PFDoA	78.97	13.4432	114.446	18.7306		PFDoA	108.5	10.4234	92.1667	7.16953		PFDoA	103.804	29.024	117.015	34.29
	PFTrDA	47.5	5.28394	30	4.34818		PFTrDA	139.044	16.9967	79.4872	26.8714		PFTrDA	64.2667	0.817856	44.1533	15.7377		PFTrDA	102.107	14.2971	136.922	40.2677
	PFTeDA	69.8667	3.56402	66.45	9.78272		PFTeDA	84.9445	11.3563	107.15	17.4656		PFTeDA	125.92	11.3894	116.95	15.2926		PFTeDA	115.105	16.1341	87.7082	62.0327
	PFBS	216b	20.8725	101b	3.91072		PFBS	101.666	3.44587	102.227	3.69917		PFBS	2639b	611.514	145b	25.828		PFBS	177.251	20.0278	128.858	13.5986
	PFPeS	105.657	4.56652	88.2133	8.24114		PFPeS	106.58	17.3589	82.5282	7.19619		PFPeS	104.02	8.78974	84.9333	6.56726		PFPeS	0	0	0	0
	PFHxS	337b	9.62958	63.2	10.1232		PFHxS	2b	2b	0b	0b		PFHxS	6004b	346.866	154.767	13.0057		PFHxS	0b	0b	0b	0b
	PFHpS	67.6333	9.76536	55.8333	4.59662		PFHpS	82.5938	6.31968	131.472	30.0189		PFHpS	181.267	34.9416	72.2467	39.9944		PFHpS	15.289	15.6387	118.39	66.5881
	PFOS	298b	14.7446	55b	9.15982		PFOS	84.6887	8.91049	120.347	27.4744		PFOS	6624b	764.986	241b	69.2796		PFOS	64.3454	16.7718	96.9913	60.0787
	PFNS	72	1.2083	56.7333	7.5199		PFNS	82.9983	6.09501	107.861	21.1819		PFNS	121.293	14.145	92	43.7155		PFNS	82.6887	24.8419	86.6078	13.6548
	PFDS	56.1	3.87556	48.6333	5.24997		PFDS	63.492	6.78792	80.0477	17.8471		PFDS	96.3667	7.88642	97.0333	17.855		PFDS	22.8421	16.2816	84.4489	29.9887
	FOSA	66.0667	7.64257	45.5667	7.18068		FOSA	77.5097	8.87336	96.885	9.15583		FOSA	0x	0x	72.0667	5.87896		FOSA	179.69	16.7385	341.865	29.6763
	N-EtFOSAA	71.1333	4.02023	62.8	5.31476		N-EtFOSAA	73.52	16.4447	94.5479	13.5109		N-EtFOSAA	106.067	13.9069	93.0033	6.24665		N-EtFOSAA	90.3517	18.7269	115.364	38.7712
	N-MeFOSAA	86.4	3.07354	77.4333	5.63875		N-MeFOSAA	78.3466	7.65697	98.0386	17.7188		N-MeFOSAA	95.8	24.802	100.5	12.6388		N-MeFOSAA	96.3675	4.30073	95.6748	31.3941
	4:2 FTS	96.0867	1.30193	33.3333	47.1405		4:2 FTS	0x	0x	84.1623	1.16967		4:2 FTS	96.7333	6.2803	122.667	25.3158		4:2 FTS	0	0	84.6173	6.22161
	6:2 FTS	90.3933	3.93718	93.13	6.8095		6:2 FTS	93.8997	5.47321	92.126	6.71881		6:2 FTS	139.507	20.2186	100.633	8.62335		6:2 FTS	75.6664	8.58782	62.5384	8.54969
	8:2 FTS	78.2233	2.06246	76.89	6.09263		8:2 FTS	85.6048	5.94933	123.753	7.13064		8:2 FTS	104.367	3.31595	97.62	11.7761		8:2 FTS	73.5547	4.7813	75.7357	19.6687
	b: Background concentration was >> matrix spike, which prohibited effective recovery.
	x: Corresponding internal standard recovery was outside of the acceptable range (50-150%).

## Sheet: Table S11
	Table S11. Impacts of 0.2 μm filter, ChlorofilterTM tubes, and QuECHERs salts in IS recovery in lettuce sample of the ACN+QuECHERs method
		100% ACN Extraction Blank				Lettuce Extract				1:9 H2O:ACN		1:1 H2O:ACN
	Analytes	Solvent only	5 g QuECHERs salt	0.2 μm filter	0.2 μm filter + ChloroFilter™ tube	0.2 μm filter	STD	Centrifuged1	STD	5 g QuECHERs salt	STD	5 g QuECHERs salt
	13C4-PFBA	76.6686	34.1626	21	1.40946	36.5528	2.65913	34.1626	5.95107	120	5	134.07
	13C5-PFPeA	89.4242	78.5832	26	0	34.7973	3.57133	78.5832	2.61913	114	7	133.46
	13C5-PFHxA	96.3586	105.684	24	0	56.9043	2.23706	105.684	6.86986	125	8	159.81
	13C4-PFHpA	100.955	105.392	26.205	0.976453	54.2815	0.647518	105.392	4.44579	105	14	132.22
	13C8-PFOA	108.607	97.438	32.1196	1.38985	65.0125	8.48533	97.438	6.3999	108	6	142.03
	13C9-PFNA	118.378	69.9427	27.5844	0	49.1286	5.69167	69.9427	8.63999	107	18	134.28
	13C6-PFDA	127.914	73.4028	24.7167	0	57.5067	5.72708	73.4028	13.3615	100	20	118.06
	13C7-PFUnA	133.275	51.6125	23.8736	0	27.4444	1.78469	51.6125	12.039	66	19	61.53
	13C2-PFDoA	127.881	35.1423	8.23645	0	10.7126	1.16281	35.1423	5.95923	54	28	48.08
	13C2-PFTeDA	130.781	19.9298	9.09351	0	9.12205	1.53156	19.9298	8.38369	36	1	21
	13C3-PFBS	107.583	100.439	88.9333	13.2886	85.013	1.15666	100.439	1.65209	121	28	157
	13C3-PFHxS	116.833	100.746	202	97	234.544	7.96006	100.746	2.70752	109	25	136
	13C8-PFOS	115.564	71.0276	107	18.456	51.5628	7.64165	71.0276	7.15911	97	33	109
	13C8-FOSA	57.8039	32.8787	93	38.0785	8.39797	2.48828	32.8787	5.76695	50	42	47
	d3-EtFOSAA	151.82	114.335	92.4737	70.7606	67.98	5.67454	114.335	16.8011	65	7	72
	d3-MeFOSAA	121.935	68.9249	100	65	30.2802	1.58332	68.9249	14.1394	70	16	123
	13C2-4:2 FtS	103.386	308.227	59	86.0617	238.185	3.76515	308.227	7.16971	131	32	211
	13C2-6:2 FtS	118.597	373.535	1.98	0	271.82	31.2831	373.535	26.4535	184	79	236
	13C2-8:2 FtS	135.38	336.968	1.475	0	200.366	29.5897	336.968	61.9357	113	63	149
	1. Unfiltered lettuce were centrifuged to replicate an alternate method of solids removal.
	with and w/o ChloroFilter Tubes, with use of 0.2 um Filter (IS recoveries) on Extraction Blank
	Analytes	Without ChloroFilter™ tube	With ChloroFilter™ tube
	13C4-PFBA	21	1.40946
	13C5-PFPeA	26	0
	13C5-PFHxA	24	0
	13C4-PFHpA	26.205	0.976453
	13C8-PFOA	32.1196	1.38985
	13C9-PFNA	27.5844	0
	13C6-PFDA	24.7167	0
	13C7-PFUnA	23.8736	0
	13C2-PFDoA	8.23645	0
	13C2-PFTeDA	9.09351	0
	13C3-PFBS	88.9333	13.2886
	13C3-PFHxS	202	97
	13C8-PFOS	107	18.456
	13C8-FOSA	93	38.0785
	d3-EtFOSAA	92.4737	70.7606
	d3-MeFOSAA	100	65
	13C2-4:2 FtS	59	86.0617
	13C2-6:2 FtS	0	0
	13C2-8:2 FtS	0	0
	with and w/o QuECHERs salt, without ChloroFilter Tubes, without use of 0.2 um Filter (IS recoveries) on Extraction Blank
	Analytes	Without QuECHERs salt	With QuECHERs salt
	13C4-PFBA	76.6686	34.1626
	13C5-PFPeA	89.4242	78.5832
	13C5-PFHxA	96.3586	105.684
	13C4-PFHpA	100.955	105.392
	13C8-PFOA	108.607	97.438
	13C9-PFNA	118.378	69.9427
	13C6-PFDA	127.914	73.4028
	13C7-PFUnA	133.275	51.6125
	13C2-PFDoA	127.881	35.1423
	13C2-PFTeDA	130.781	19.9298
	13C3-PFBS	107.583	100.439
	13C3-PFHxS	116.833	100.746
	13C8-PFOS	115.564	71.0276
	13C8-FOSA	57.8039	32.8787
	d3-EtFOSAA	151.82	114.335
	d3-MeFOSAA	121.935	68.9249
	13C2-4:2 FtS	103.386	308.227
	13C2-6:2 FtS	118.597	373.535
	13C2-8:2 FtS	135.38	336.968

## Sheet: Table S12a
	Table S12a. Internal standard recovery (200 ng/L) with and without envicarb cleanup for extraction blanks and samples prepared with the MTBE and MeOH methods
	IS Name	Plant Extraction-MTBE method																Tissue Extraction-MTBE method								Tissue Extraction-Neutral MeOH method
	IS Recovery (%)	BLK Envicarb	STD	BLK no Envicarb	STD	Organic Lettuce Envicarb	STD	Organic Lettuce no Envicarb	STD	Corn Envicarb	STD	Corn no Envicarb	STD	Greenbean Envicarb	STD	Greenbean no Envicarb	STD	BLK Envicarb	STD	BLK no Envicarb	STD	Liver Envicarb	STD	Liver no Envicarb	STD	BLK Envicarb	STD	BLK no Envicarb	STD	Liver Envicarb	STD	Liver no Envicarb	STD
	13C4-PFBA	93.7567	12.7	85.4558	13.1196	80.3637	10.5162	69.1786	8.95006	65.7751	8.6957	64.9897	8.70479	80.0396	11.5004	78.032	11.5858	58.8595	9.1476	53.8536	6.09314	31.3547	6.10109	31.4112	5.54012	73.1934	9.24142	74.4591	12.2957	26.9525	2.7561	26.7762	2.87052
	13C5-PFPeA	98.9611	11.2954	92.761	11.6943	97.7024	12.485	80.9861	9.07309	89.3219	9.3524	87.121	13.647	91.8087	11.0058	94.923	12.5246	72.2567	10.292	67.3172	10.4075	31.6872	7.56674	32.5148	4.96529	75.9284	11.5665	71.6717	15.3253	37.151	3.10636	37.8381	3.00388
	13C5-PFHxA	100.418	14.2569	93.0774	11.955	102.057	15.7078	86.9734	12.4311	112.383	15.8155	110.857	13.0619	113.836	17.5583	109.725	19.4145	80.1446	13.3485	77.1323	14.9617	54.1295	9.92544	54.1864	8.45297	82.9361	11.5483	83.2913	14.1104	40.059	4.02146	47.5859	6.55376
	13C4-PFHpA	76.5706	9.18497	66.4663	7.78159	73.0029	6.79802	58.6446	7.0473	77.9037	10.8612	78.4576	11.5781	82.5329	11.4455	78.4144	12.5815	54.3544	7.90423	48.398	7.67532	34.5371	6.09653	33.2006	4.83827	60.1747	7.95225	62.1127	8.92061	39.0157	5.44903	36.6293	6.11642
	13C8-PFOA	99.4353	14.7804	85.661	8.33382	102.442	13.5926	81.8031	12.1881	89.9505	13.1622	85.5753	17.1852	92.5787	11.2268	88.7111	15.2132	67.451	10.7709	61.9069	7.57379	44.0065	8.63837	43.151	6.25651	65.2667	10.3744	63.2647	11.0503	15.023	1.67197	15.2323	1.78269
	13C9-PFNA	102.764	12.1848	93.5197	13.0358	98.8734	13.7716	86.2435	10.1893	107.93	13.9412	106.645	12.1765	108.111	19.4357	101.321	15.453	81.1425	14.7592	77.3355	14.9958	57.9576	10.9598	56.7799	12.7403	76.6919	14.0946	84.0113	13.7453	66.2747	13.0822	70.5554	10.7369
	13C6-PFDA	122.595	15.6651	106.521	17.416	117.607	15.2059	92.4387	14.4331	107.346	18.3962	110.98	19.8428	108.783	20.481	108.078	17.7606	76.3284	17.4156	68.5294	11.2304	48.7466	8.8656	49.9574	9.40138	71.0774	13.4433	75.9634	15.3319	66.6514	14.2455	66.6529	12.1423
	13C7-PFUnA	133.848	14.832	120.583	18.2097	132.914	15.3546	93.9335	12.3912	110.888	16.1994	105.628	16.3368	108.951	19.0308	104.418	21.7259	70.1003	13.2767	65.7365	10.0902	45.3181	12.8666	46.499	9.3998	73.8971	15.8262	67.4916	6.72211	59.9027	12.216	62.7257	18.2313
	13C2-PFDoA	146.992	20.7188	127.378	18.4495	145.477	23.1746	110.652	12.6655	100.587	18.82	99.9664	14.0382	71.455	13.2291	69.021	10.8309	71.5937	11.4115	61.889	5.05104	46.9489	7.91565	46.6893	10.8141	73.195	13.8403	70.7705	12.0825	60.1116	15.2605	55.8182	19.2722
	13C2-PFTeDA	454.825	47.2019	386.41	49.1973	395.854	76.5975	331.446	37.0353	121.494	9.97332	126.981	20.3184	131.78	10.2489	109.089	9.75731	29.585	3.6949	24.2001	3.03271	28.0965	5.25553	21.6146	4.08042	38.7069	6.29728	42.8073	11.0163	21.5852	2.09759	16.6118	0.146591
	13C3-PFBS	92.9697	9.49418	88.3347	11.591	87.9694	12.8411	79.8032	12.9603	91.3962	13.1999	89.6196	13.7285	84.8034	11.1326	93.4051	11.557	72.7861	11.5487	70.3482	10.8789	33.0225	4.69984	33.3053	5.06624	75.7195	9.71417	76.8244	9.68724	65.6985	12.8294	67.4738	8.99622
	13C3-PFHxS	86.877	9.51767	76.2761	7.92997	80.8673	8.50829	65.9076	7.06416	71.4763	12.2146	70.2526	9.67958	81.8204	10.8078	73.7337	15.5031	68.5059	10.0109	61.2315	7.73662	40.0534	5.50607	40.3655	7.57767	69.8734	8.35847	71.178	9.37576	63.1516	12.4319	62.4802	9.09009
	13C8-PFOS	98.7661	14.0426	97.7934	14.9605	93.8853	10.8207	82.8721	14.3015	86.2475	14.7222	85.3667	15.0884	88.0092	13.1271	82.545	14.5145	75.9645	14.5888	70.2871	13.2577	51.5507	8.93587	51.4213	8.6953	75.915	11.6914	76.3272	13.3698	72.6518	12.8927	70.9129	9.36607
	13C8-PFOSA	76.1464	9.69427	73.6908	9.11858	86.1636	10.6157	83.5274	8.28283	92.2941	11.387	90.5634	15.8628	87.7888	12.9927	87.8675	11.9139	12.5433	1.78319	13.127	1.70569	56.7238	8.54222	57.9168	9.52493	25.0159	1.85079	26.3847	3.06928	35.9587	5.81094	37.7198	4.62285
	d3-EtFOSAA	140.726	17.2526	154.526	26.1506	139.906	15.7358	117.175	13.1268	160.76	11.3904	156.417	23.3667	160.731	20.173	173.298	19.8259	78.8459	17.4804	79.3899	14.456	64.1431	10.7669	56.7792	14.4865	71.019	9.68352	85.4762	25.2634	77.121	7.44724	71.729	11.488
	d5-MeFOSAA	122.469	17.6568	127.234	21.7004	126.582	19.7753	115.92	15.7054	127.873	16.0882	133.974	11.7846	132.601	20.9279	146.145	27.7118	81.7786	12.1211	86.811	19.6104	75.3863	12.0807	73.6938	10.2052	79.3457	14.1	95.5572	22.3251	91.7995	14.734	81.6968	17.0255
	13C2-4:2 FtS	118.382	12.5549	125.579	15.7535	124.272	14.8546	114.494	13.7641	203.451	32.3211	208.147	28.6234	204.746	34.9391	215.597	42.1867	120.893	18.3773	125.153	19.2427	69.7989	12.0018	74.4722	8.12418	83.2056	15.5875	100.72	21.5766	155.431	25.0887	154.685	19.4047
	13C2-6:2 FtS	210.606	35.3381	219.164	28.2518	224.336	28.4558	210.073	25.6367	389.354	55.0955	361.549	51.8745	400.222	59.9454	383.512	51.8952	144.885	18.7341	165.718	6.91951	117.603	17.297	114.784	11.7871	85.3967	13.3037	128.84	14.1888	74.4445	11.8758	73.5743	8.19646
	13C2-8:2 FtS	187.77	23.251	228.312	36.152	221.615	41.1366	211.705	32.4392	275.398	49.1961	278.765	34.4228	287.849	42.3078	324.837	56.6602	121.899	36.964	120.56	31.3335	119.312	20.4658	120.724	20.439	62.7797	13.8856	89.8599	34.3613	168.459	32.0328	166.882	28.5842

[truncated: 2 more sheets: Table S12b, Table S13]
